# Supplementary material for: Metal–semiconductor ternary hybrids for efficient visible-light photocatalytic hydrogen evolution
Source: Royal Society of Chemistry journal article supplement (doi:10.1039/c8ta03462a), 2018-01-01
Supplement: c8ta03462a1.pdf [file c8ta03462a1.pdf]

Electronic Supplementary Information (ESI) for

**Metal-semiconductor ternary hybrids for efficient visible-light  
photocatalytic hydrogen evolution**

Dae Han Wi,<sup>‡a</sup> Se Young Park,<sup>‡a</sup> Seunghoon Lee,<sup>a</sup> Jiha Sung,<sup>b</sup> Jong Wook Hong<sup>\*ac</sup> and Sang  
Woo Han<sup>\*a</sup>

<sup>a</sup> Center for Nanotectonics, Department of Chemistry and KI for the NanoCentury, KAIST,  
Daejeon 34141, Korea

<sup>b</sup> Department of Applied Chemistry, Dongduk Women's University, Seoul 02748, Korea

<sup>c</sup> Department of Chemistry, University of Ulsan, Ulsan 44610, Korea

\*Corresponding author. *E-mail*: sangwoohan@kaist.ac.kr (S.W.H.), jwhong@ulsan.ac.kr  
(J.W.H.)

<sup>‡</sup>These authors contributed equally to this work.

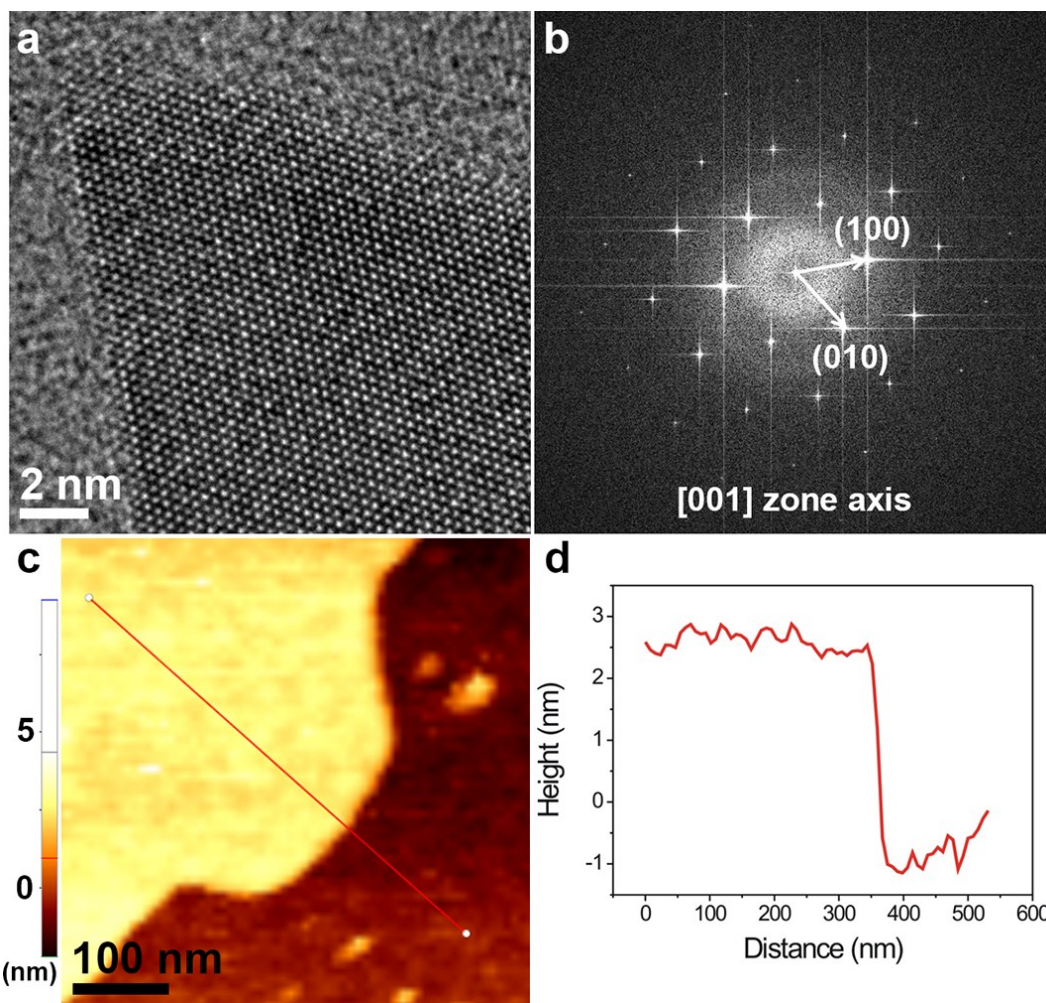

**Fig. S1** (a) HRTEM image and (b) corresponding FFT pattern of e-MoS<sub>2</sub>. (c) AFM image and (d) corresponding height profile of e-MoS<sub>2</sub>.

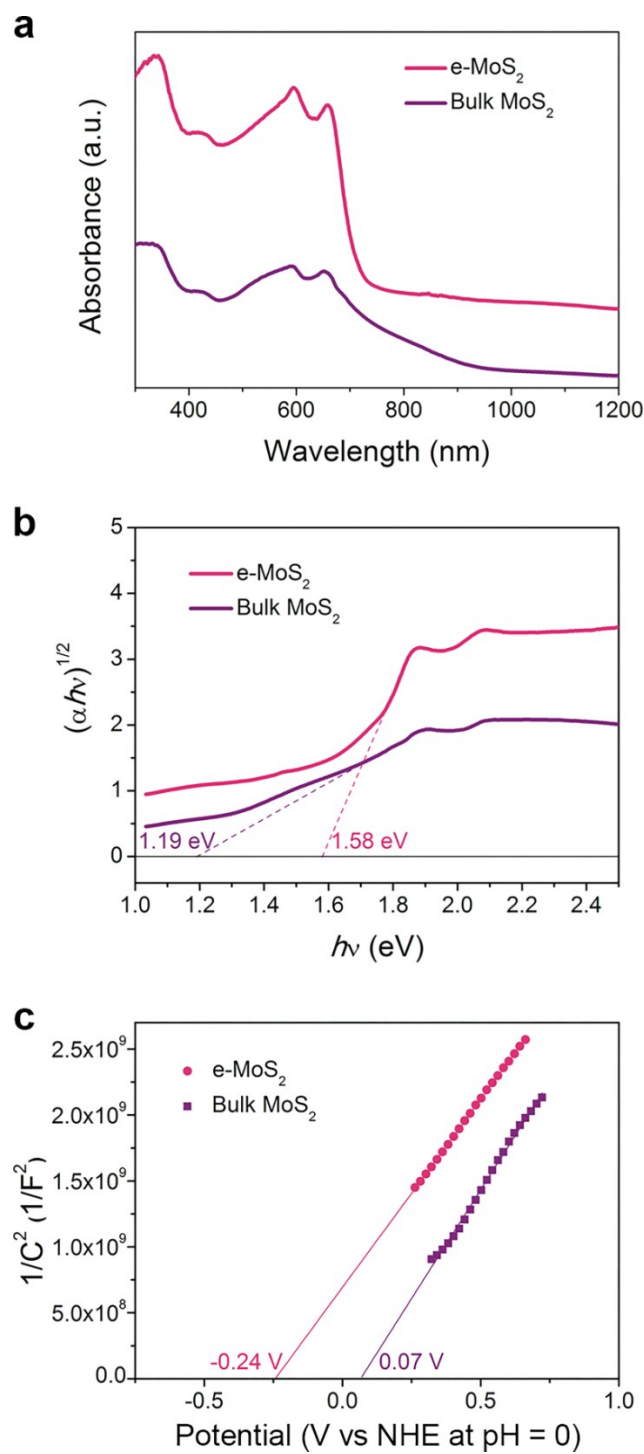

**Fig. S2** (a) Diffuse reflectance spectra and (b) corresponding Tauc plots of e-MoS<sub>2</sub> and bulk MoS<sub>2</sub>. (c) Mott-Schottky plots of e-MoS<sub>2</sub> and bulk MoS<sub>2</sub>.

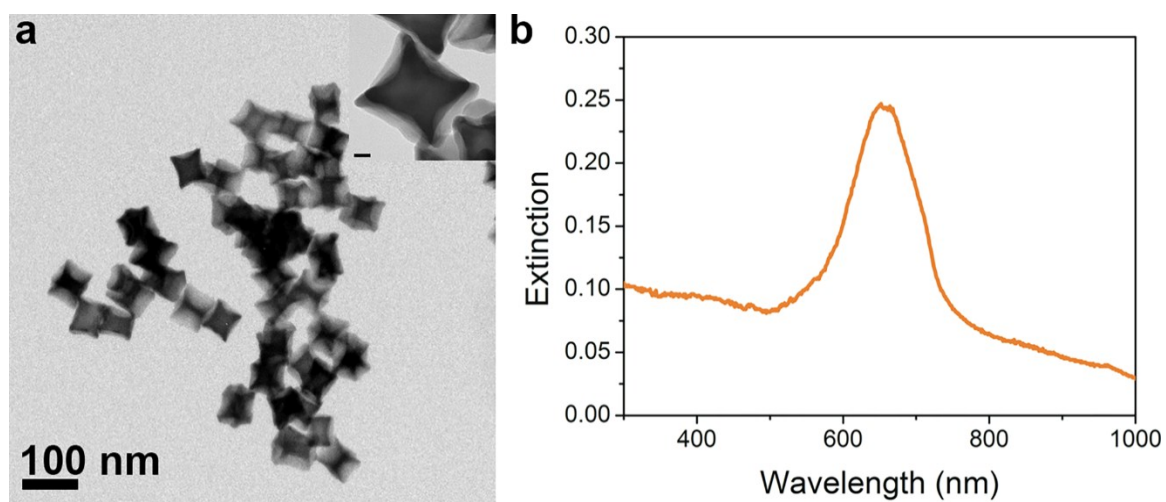

**Fig. S3** (a) TEM image of Au CNCs. Inset shows a magnified TEM image of Au CNCs (scale bar = 10 nm). (b) Extinction spectrum of Au CNCs in water.

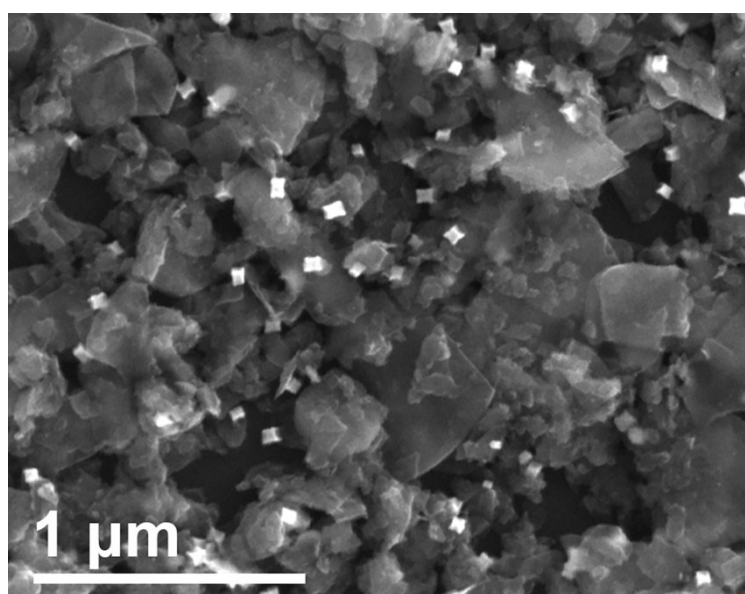

**Fig. S4** SEM image of e-MoS<sub>2</sub>-Au<sub>CNC</sub> hybrids.

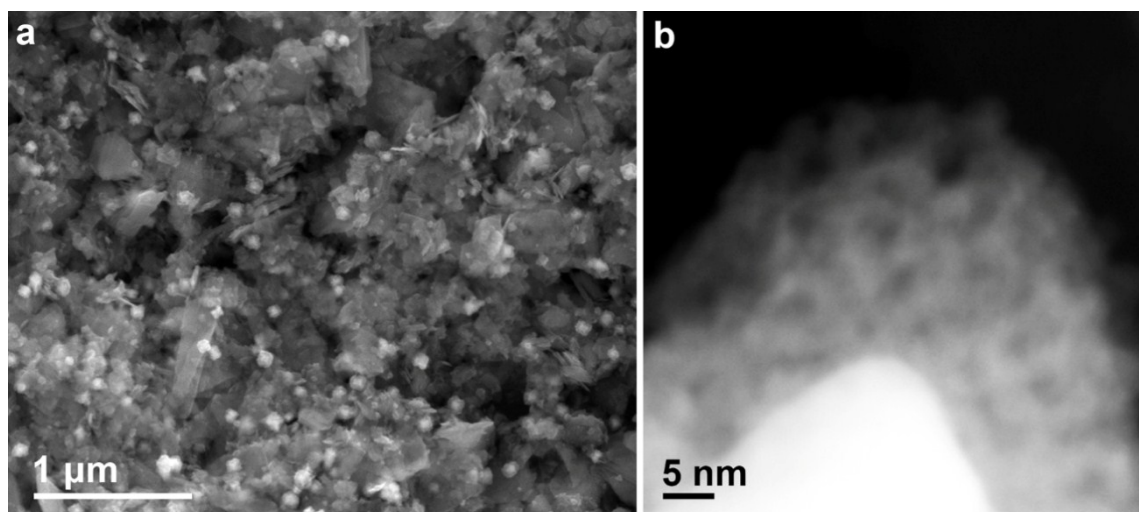

**Fig. S5** (a) SEM image and (b) high-magnification HAADF-STEM image of e-MoS<sub>2</sub>-Au<sub>CNC</sub>-CdS hybrids.

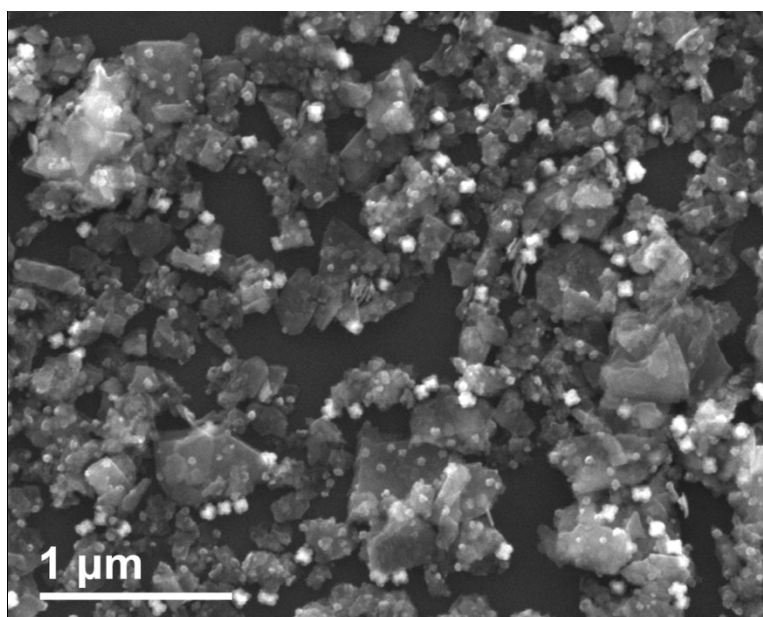

**Fig. S6** SEM image of hybrids prepared with 100 mM of CTAB solution. In the standard synthesis, 400 mM of CTAB solution was used.

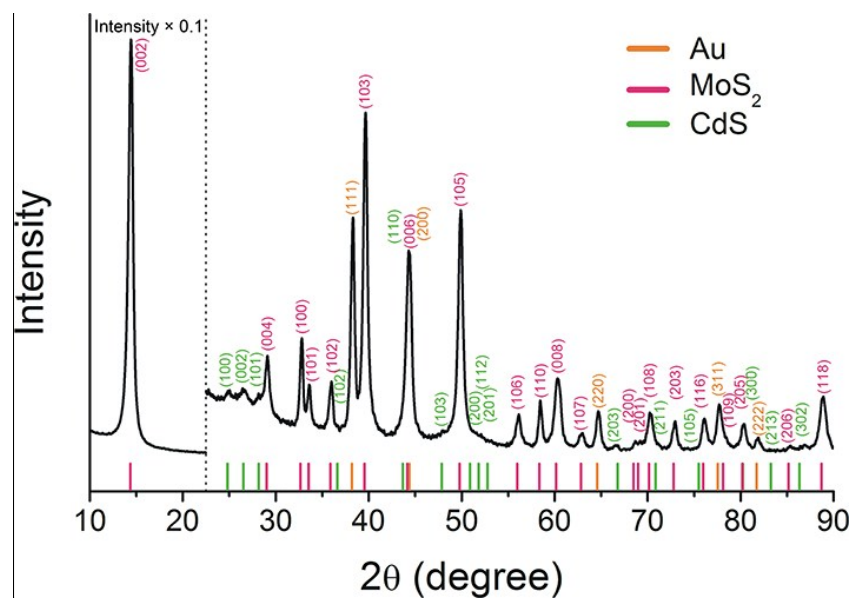

**Fig. S7** XRD pattern of e-MoS<sub>2</sub>-Au<sub>CNC</sub>-CdS hybrids. The positions of Au, MoS<sub>2</sub>, and CdS references were taken from the JCPDS database (Au: 04-0784, MoS<sub>2</sub>: 37-1492, CdS: 41-1049).



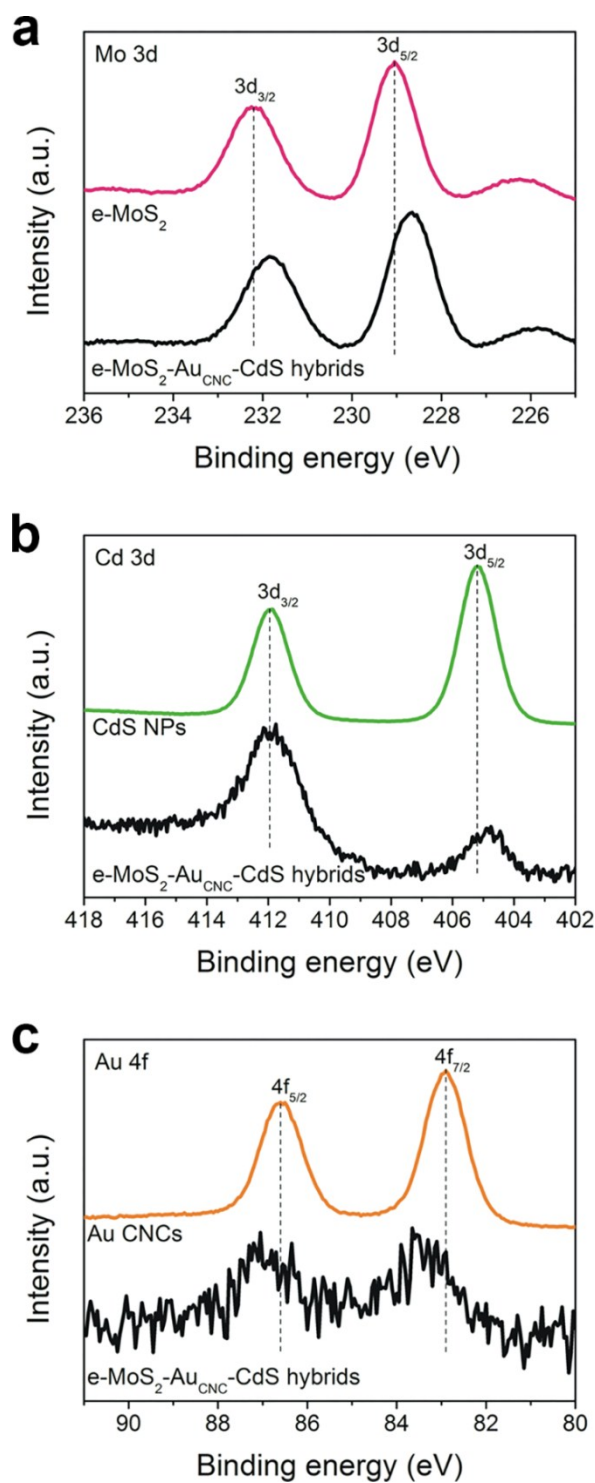

**Fig. S8** XPS spectra of e-MoS<sub>2</sub>-Au<sub>CNC</sub>-CdS hybrids, e-MoS<sub>2</sub>, CdS NPs, and Au CNCs in (a) Mo 3d, (b) Cd 3d, and (c) Au 4f regions.

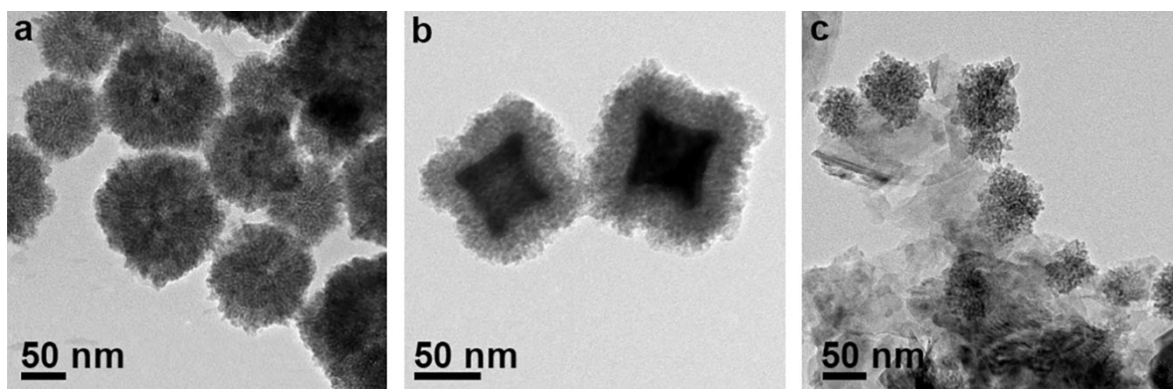

**Fig. S9** TEM images of (a) CdS NPs, (b) Au<sub>CNC</sub>-CdS hybrids, and (c) e-MoS<sub>2</sub>-CdS hybrids.



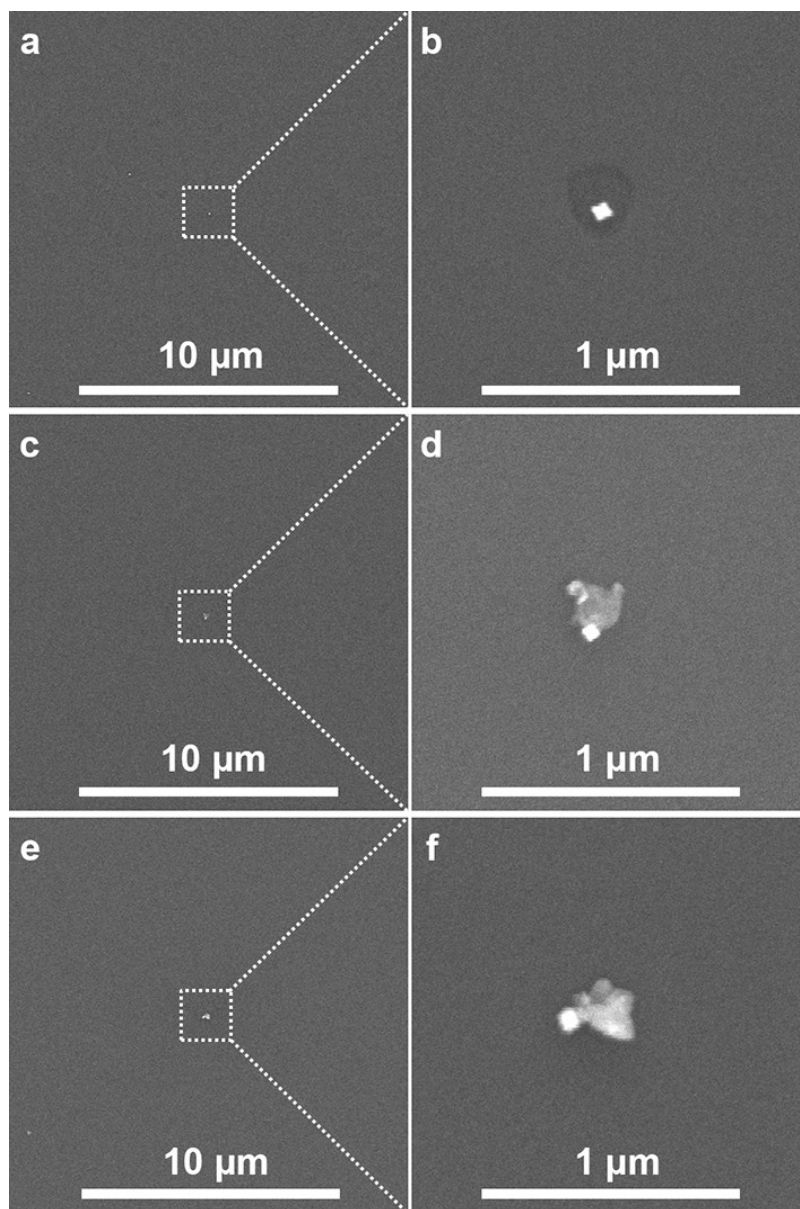

**Fig. S10** (a,c,e) Low- and (b,d,f) high-magnification SEM images of (a,b) Au CNCs, (c,d) e-MoS<sub>2</sub>-Au<sub>CNC</sub> hybrids, and (e,f) e-MoS<sub>2</sub>-Au<sub>CNC</sub>-CdS hybrids loaded on cover glass substrates.

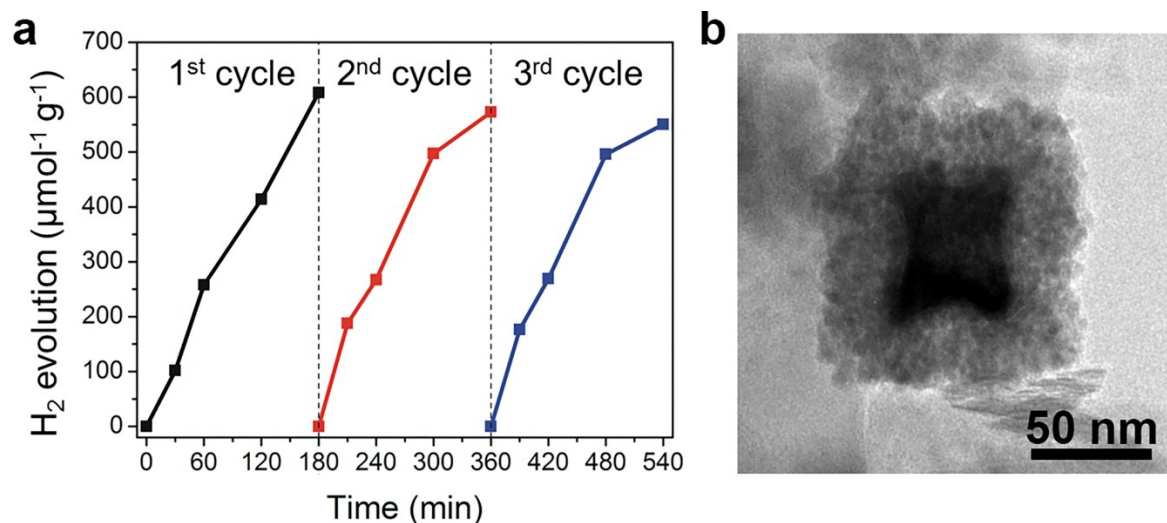

**Fig. S11** (a) Recyclability of e-MoS<sub>2</sub>-Au<sub>CNC</sub>-CdS hybrids for photocatalytic hydrogen evolution. After each photocatalysis run, a quartz reaction cell was purged with Ar gas to remove remaining hydrogen, and then subjected to the next photocatalytic reaction. The e-MoS<sub>2</sub>-Au<sub>CNC</sub>-CdS hybrids exhibited 90% photocatalytic activity in the third cycle relative to that in the first cycle. (b) TEM image of the e-MoS<sub>2</sub>-Au<sub>CNC</sub>-CdS hybrids after the third cycle of photocatalysis, revealing that their original morphology was maintained after the reaction.

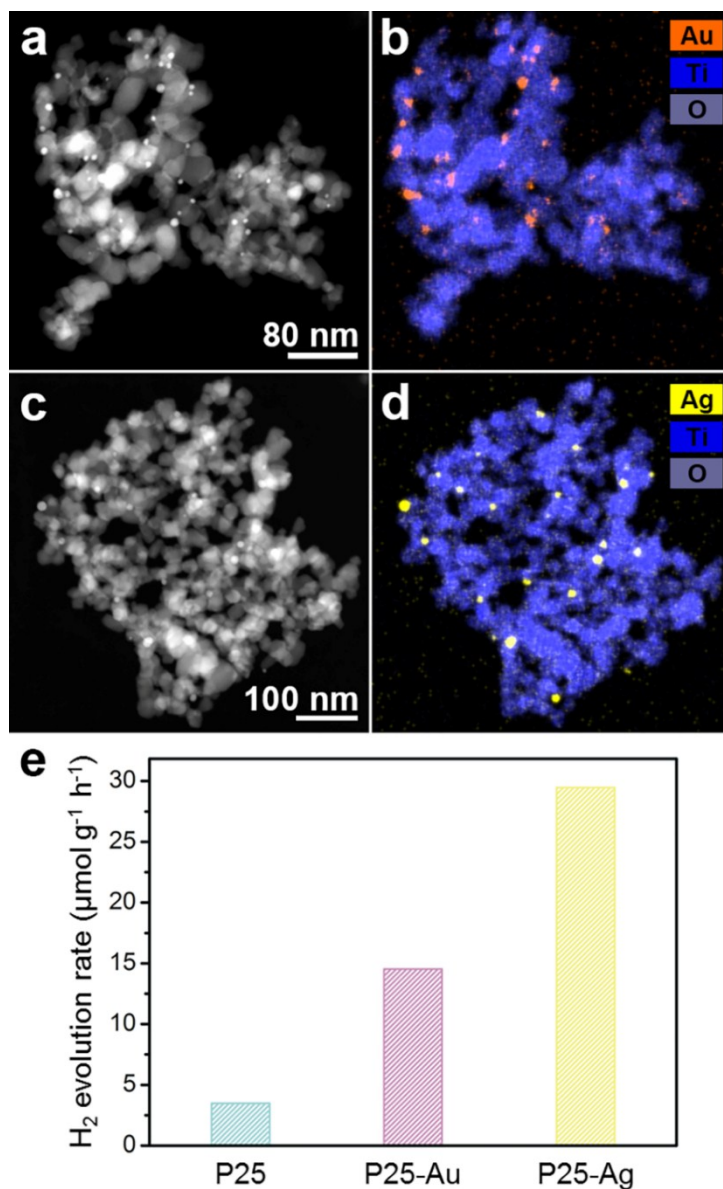

**Fig. S12** (a,c) HADDF-STEM and (b,d) corresponding EDS elemental mapping images of (a,b) P25-Au and (c,d) P25-Ag. (e) Hydrogen evolution rates of P25, P25-Au, and P25-Ag.

In a typical synthesis of P25-Au or P25-Ag photocatalyst, 5 mg of P25 powder was injected into a quartz cell containing 45 mL of water and 5 mL of methanol. Then, 1 mL of an aqueous solution of H<sub>2</sub>AuCl<sub>4</sub> or AgNO<sub>3</sub> (1 mg mL<sup>-1</sup>) was added to the reaction mixture, and the resultant mixture was bubbled under Ar for 30 min. The mixture was then irradiated using 400 W Hg lamp (Newport 66902) for 30 min. The products were washed with water and ethanol, and dried in an oven at 95 °C. The average Au and Ag particle sizes of P25-Au and P25-Ag were 6 and 9 nm, respectively.

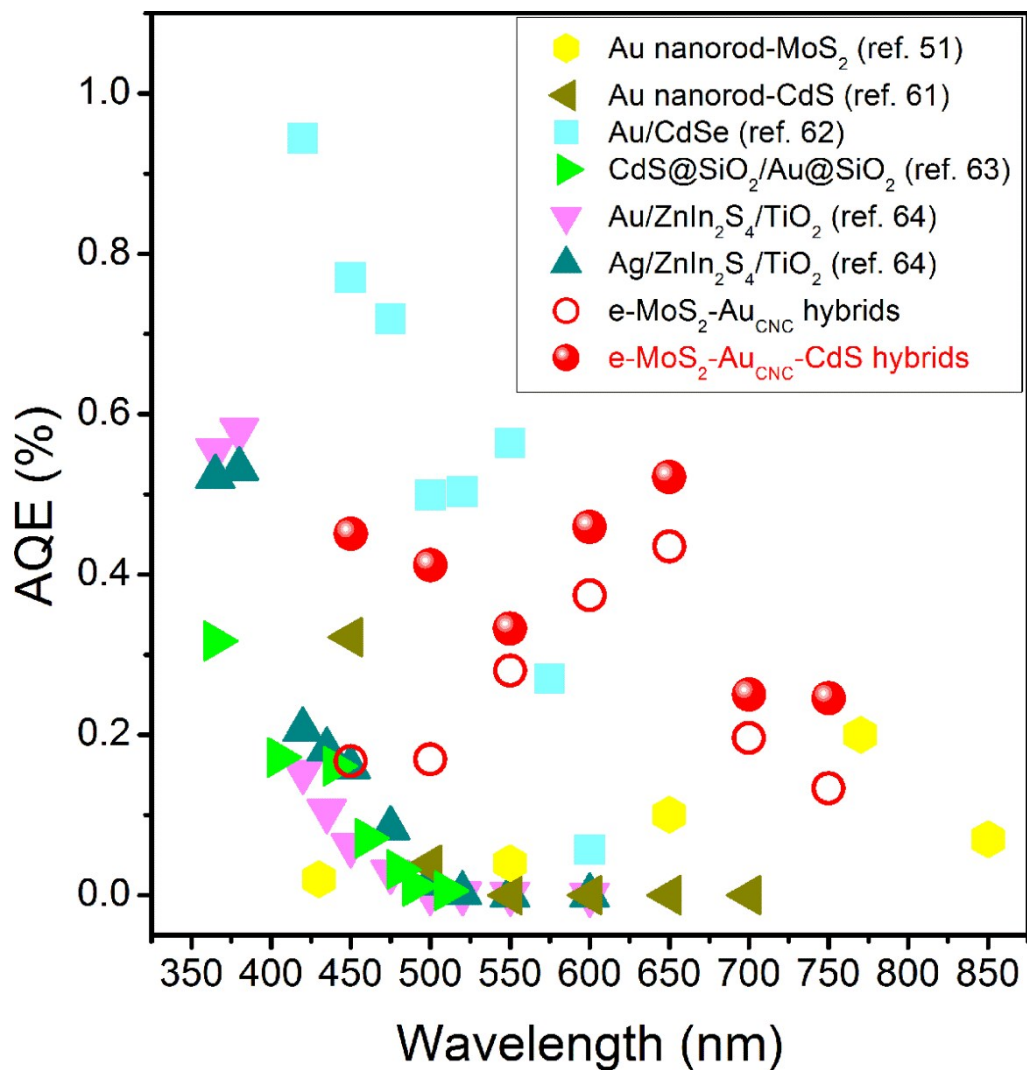

**Fig. S13** AQEs of e-MoS<sub>2</sub>-Au<sub>CNC</sub>-CdS hybrids, e-MoS<sub>2</sub>-Au<sub>CNC</sub> hybrids, and other previously reported hybrid photocatalysts as a function of excitation wavelength. The AQE values and excitation wavelengths of other photocatalysts were obtained from literatures: refs. 51, 61-64. The AQE values of e-MoS<sub>2</sub>-Au<sub>CNC</sub>-CdS and e-MoS<sub>2</sub>-Au<sub>CNC</sub> hybrids under 650 nm irradiation were 0.52 and 0.44%, respectively.

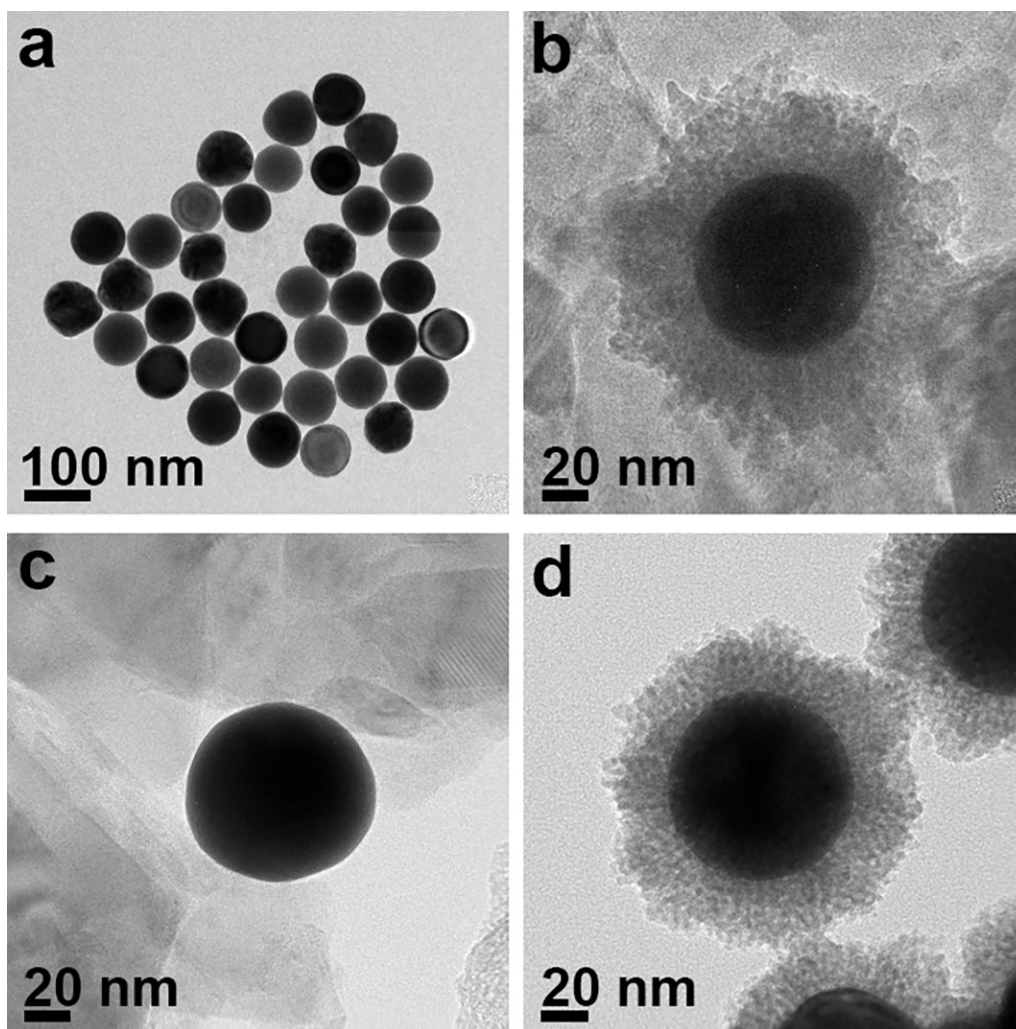

**Fig. S14** TEM images of (a) spherical Au NCs, (b) e-MoS<sub>2</sub>-Au<sub>sphere</sub>-CdS, (c) e-MoS<sub>2</sub>-Au<sub>sphere</sub>, and (d) Au<sub>sphere</sub>-CdS hybrids.

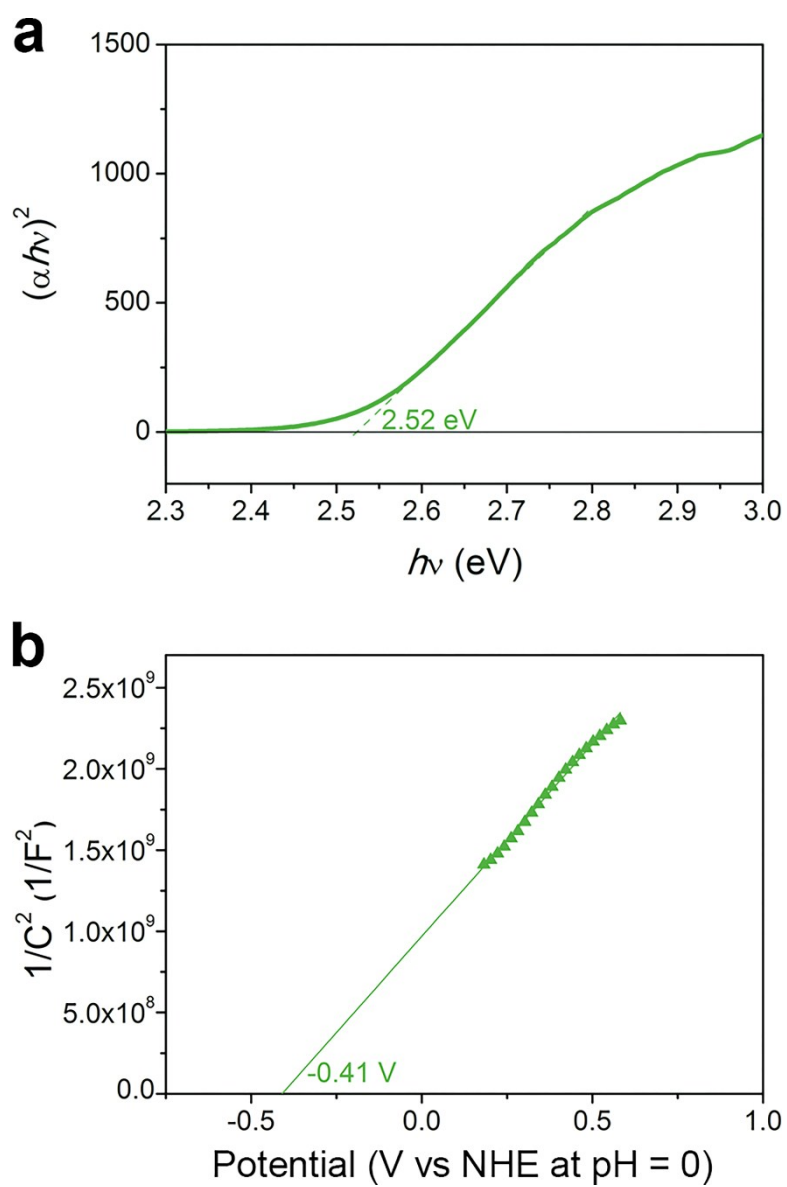

**Fig. S15** (a) Tauc and (b) Mott-Schottky plots of CdS NPs.

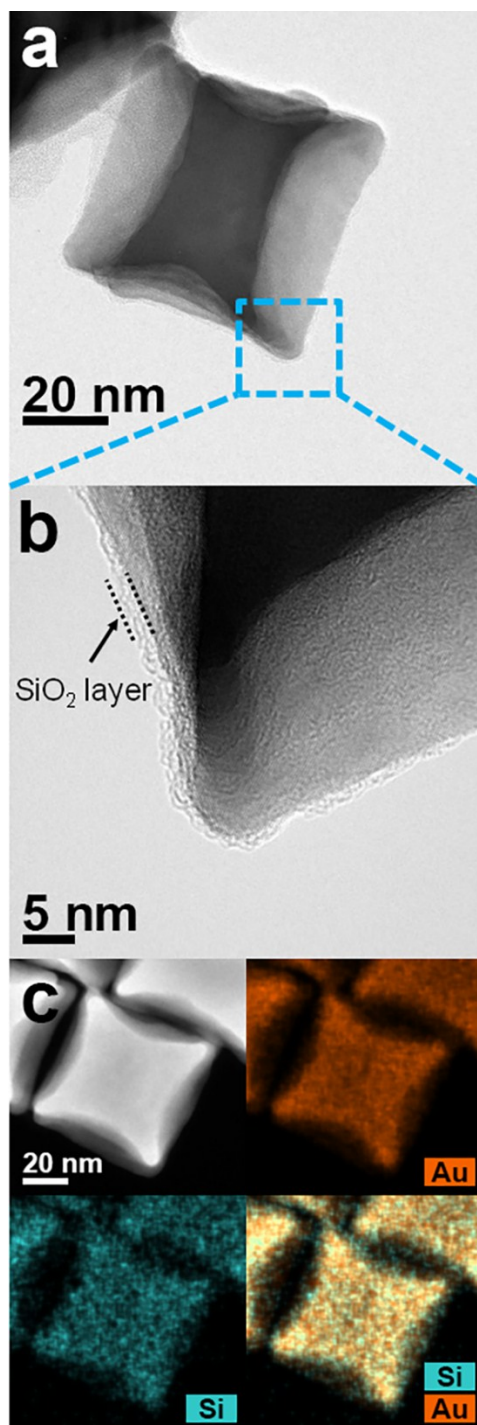

**Fig. S16** (a) TEM image of  $\text{Au}_{\text{CNC}}@ \text{SiO}_2$  core-shell NCs. (b) HRTEM image of blue square region in part a. (c) HAADF-STEM image and corresponding EDS elemental mapping images of  $\text{Au}_{\text{CNC}}@ \text{SiO}_2$  core-shell NCs.



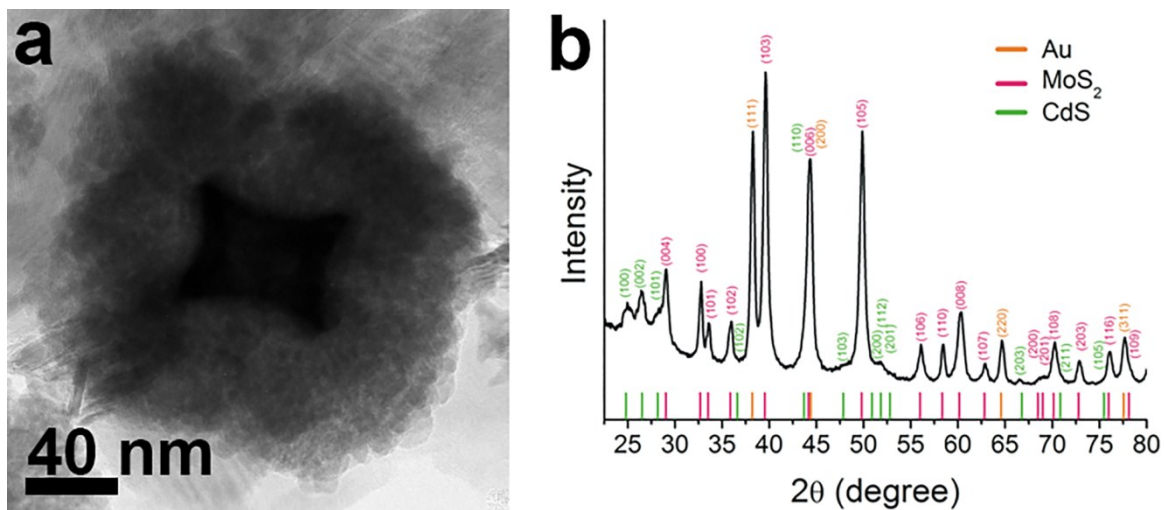

**Fig. S17** (a) TEM image and (b) XRD pattern of e-MoS<sub>2</sub>-Au<sub>CNC</sub>-CdS<sub>thick</sub> hybrids. The positions of Au, MoS<sub>2</sub>, and CdS references were taken from the JCPDS database (Au: 04-0784, MoS<sub>2</sub>: 37-1492, CdS: 41-1049).
